# Supplementary material
Source: publisher figshare collection journal article supplement (https://acs.figshare.com/ndownloader/files/20183687)
Supplement: Supplementary file 1 [file 20183687]

**Supporting Information for:**  
**Fast and All-Optical Hydrogen Sensor Based on Gold-Coated Optical Fiber**  
**Functionalized with Metal-Organic Framework Layer**

Elena Miliutina<sup>a,b</sup>, Olga Guselnikova<sup>a,b</sup>, Sofiia Chufistova<sup>a</sup>, Zdenka Kolska<sup>c</sup>, Roman Elashnikov<sup>a</sup>,  
Vasilii Burtsev<sup>a</sup>, Pavel Postnikov<sup>a,b</sup>, Vaclav Svorcik<sup>a</sup>, Oleksiy Lyutakov<sup>\*a,b</sup>

<sup>a</sup> *Department of Solid State Engineering, University of Chemistry and Technology, 16628 Prague, Czech Republic*

<sup>b</sup> *Research School of Chemistry and Applied Biomedical Sciences, Tomsk Polytechnic University, Russian Federation*

<sup>c</sup> *Materials Centre, Faculty of Science J. E. Purkyně University, 400 96 Ústí nad Labem, Czech Republic*

---

<sup>\*</sup> *Corresponding author: lyutakoo@vscht.cz*

## ***Experimental details***

### *Preparation of ADT-COOH*

To a solution of p-TsOH (1.425 g, 7.5 mmol) in acetic acid (12 mL), tert-butyl nitrite was slowly added (0.9 mL, 7.5 mmol). Next, 4-aminobenzoic acid (0.685 g, 5 mmol) was added in 4 steps to the reaction mixture over 1 min. The mixture was stirred for 30–40 min until TLC indicated the complete consumption of the amine (hexane/ether 1:1). After completion, the reaction mixture was precipitated by adding diethyl ether (200 mL). The precipitate was washed with diethyl ether, filtered under reduced pressure and dried under vacuum.

*Preparation of IRMOF-20 mother liquid and surface assisted growth of IRMOF-20.* Preparation of IRMOF-20 modified surface was carried out according to <sup>[45]</sup> with slight modifications. Thieno[3,2-b]thiophene-2,5-dicarboxylic acid (0.075 g, 0.33 mmol) and zinc nitrate tetrahydrate (0.3 g, 1.1 mmol) were dissolved in 10 mL of N,N-diethylformamide with stirring in a mouth glass jar. The jar was tightly capped and placed in a 100 °C oven for 18 h to yield cubic crystals. After cooling down to room temperature, the suspension was centrifugated for 3 h (7700rpm) and mother liquid was used for further surface-assisted MOF growth.

The residual powder was rinsed with DMF, the product was immersed in chloroform for 1 d, washed 3 times by chloroform and dried under vacuum at room temperature. The resulting powder was used for comparative analysis.

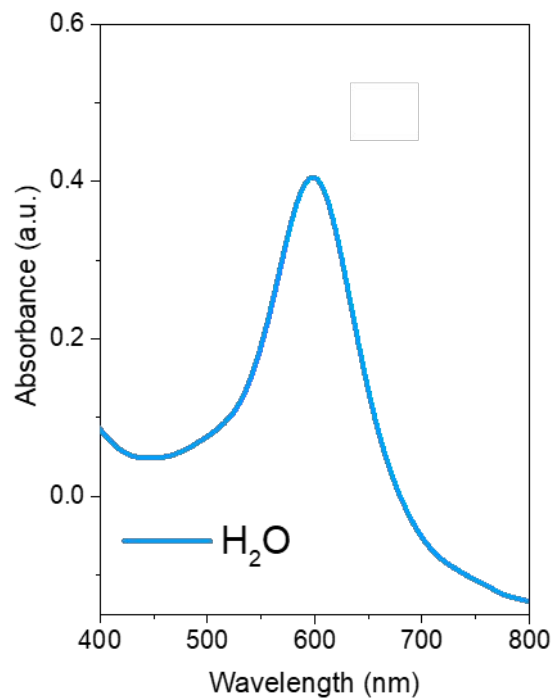

**Fig. S1**

Control measurements of plasmon absorption band appearance (before grafting of IRMOF-20 layer): UV-Vis spectrum of gold-coated optical fiber in the underwater conditions (the light transmission at air was used as a spectral background).

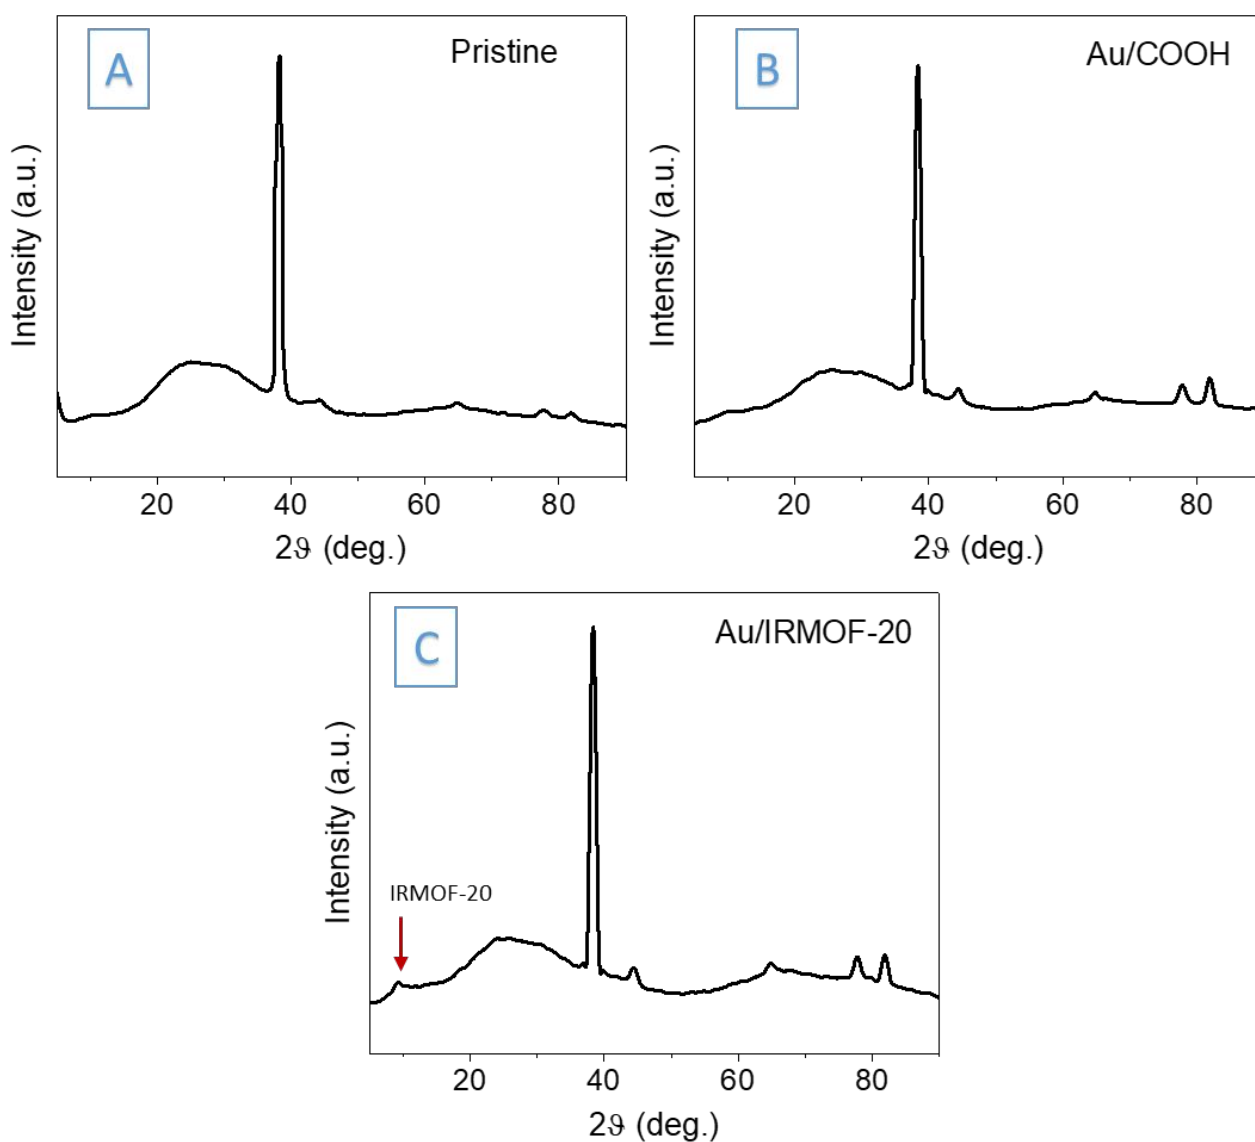

**Fig. S2**

Control measurements and XRD proof of the crystallic nature of surface grown IRMOF-20 layer: XRD-diffractograms of pristine thin gold film (A), thin gold film grafted by ADT-COOH (B), and thin gold film decorated with thin IRMOF-20 layer, according the used experimental procedure (C). The more informative IRMOF XRD peak, corresponding to “large” crystallographic parameter (arising from IRMOF-20) is designated by array in the part C.

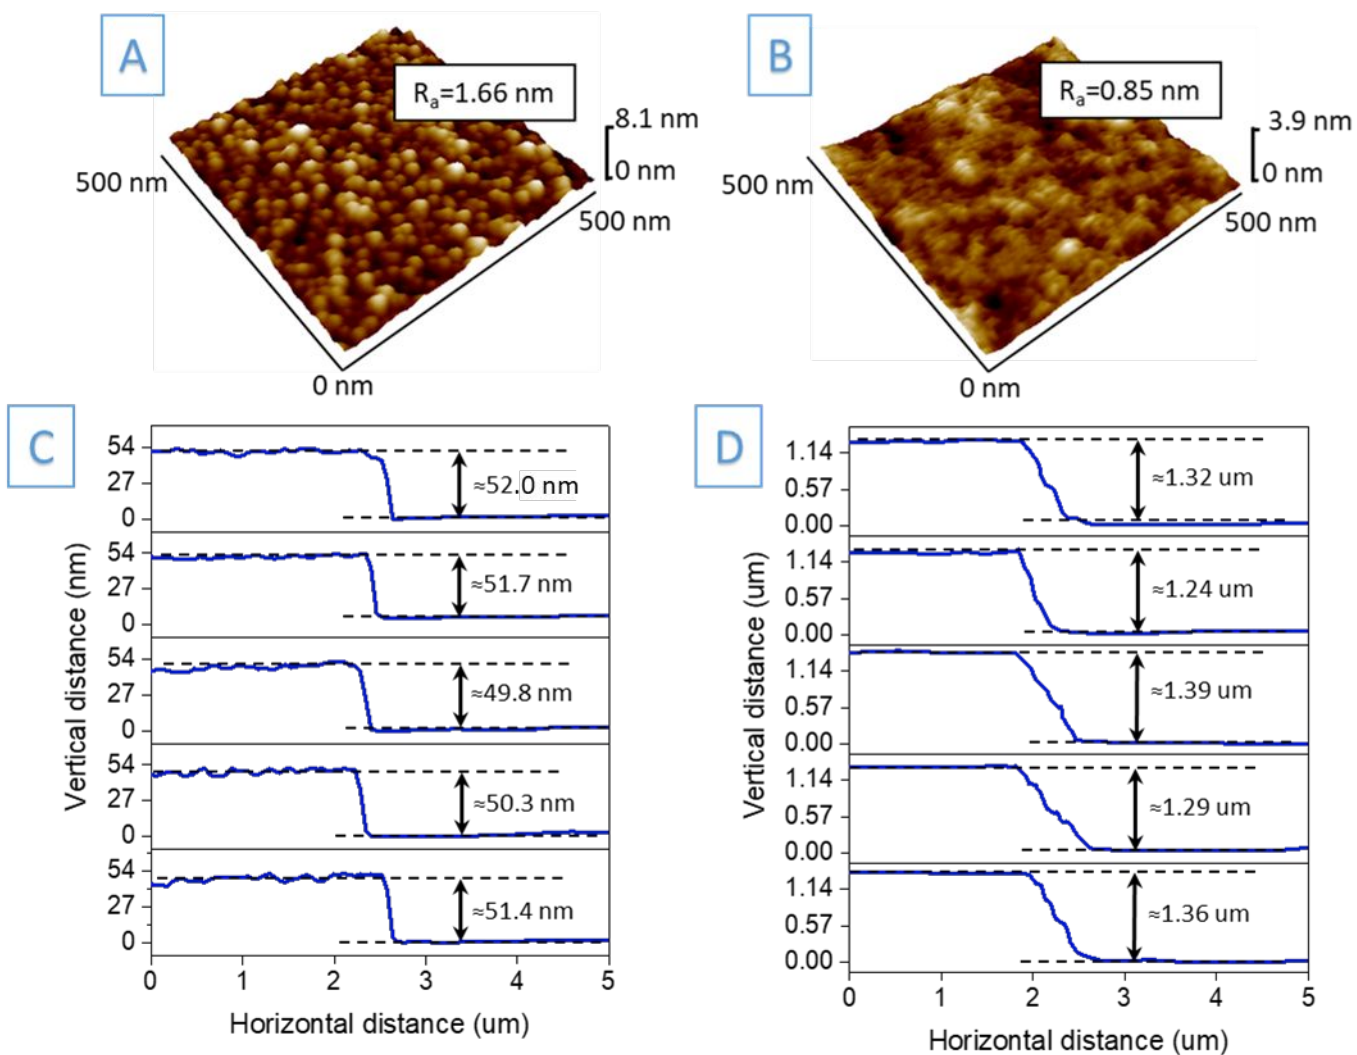

**Fig. S3**

AFM images of plasmon-active surface of the optical fiber after gold deposition (A) and subsequent IRMOF-20 grafting (B). AFM scratch tests, demonstrated the thickness of the gold layer (C) and the gold layer grafted with IRMOF-20 (D).

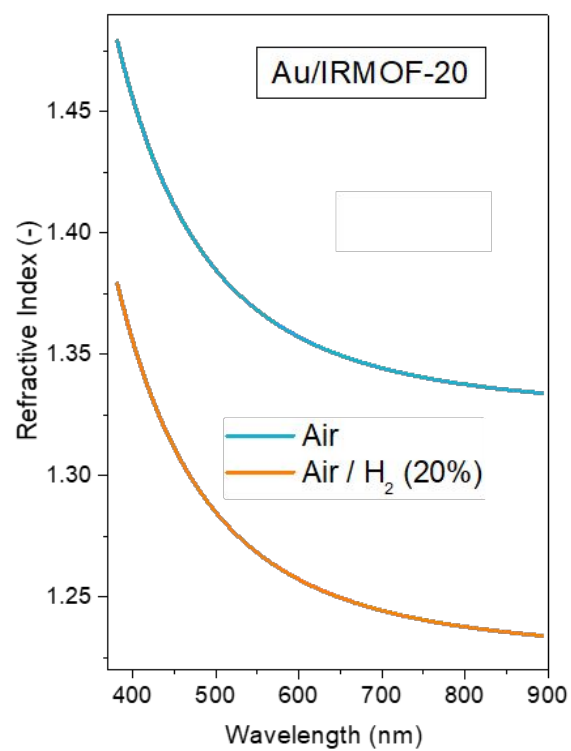

**Fig. S4**

Control ellipsometry measurements: wavelength dispersion of IRMOF-20 refractive index (real part) measured at air or in the hydrogen/air mixture.

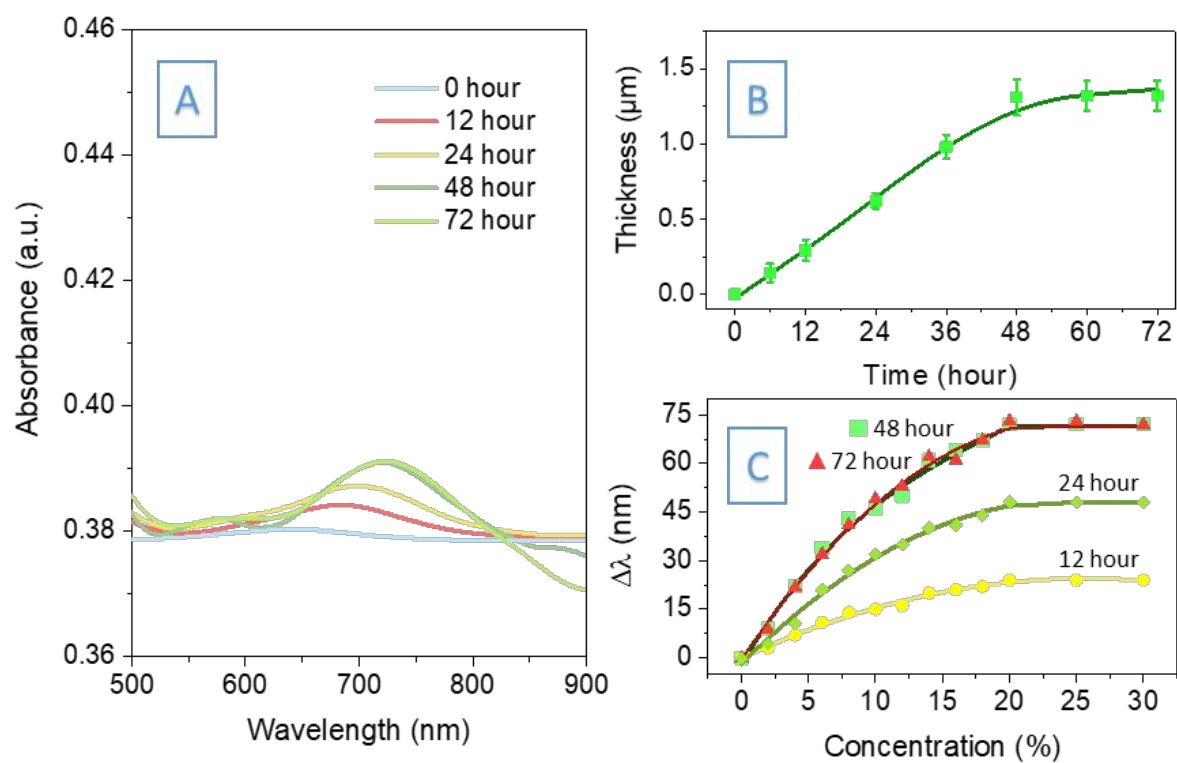

**Fig. S5**

(A) - UV-Vis absorption spectra, measured after different times of IRMOF-20 surface assisted grown, (B) – dependency of IRMOF-20 thickness on the time of grown, (C) – shift of plasmon absorption band due to hydrogen presence as a function of IRMOF-20 time of grown.

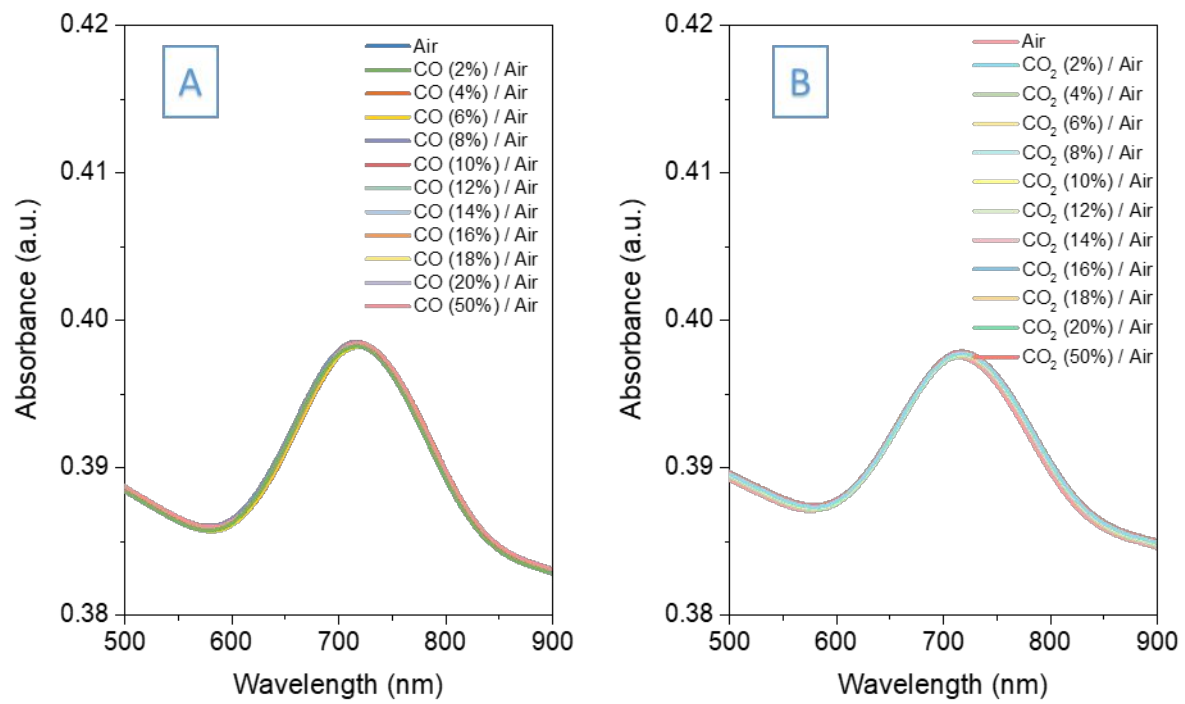

**Fig. S6**

Spectral position of plasmon absorption band of proposed optical fiber sensor as a function of the increased concentration of CO<sub>2</sub> (A) or presence of different CO concentrations (B) in the air.
